# Supplementary material for: Occupational Sitting Time, Leisure Physical Activity, and All-Cause and Cardiovascular Disease Mortality
Source: PubMed Central journal article supplement (PMC10799265; doi:10.1001/jamanetworkopen.2023.50680), 2024-01-19
Supplement: jamanetwopen-e2350680-s001.pdf [file jamanetwopen-e2350680-s001.pdf]

## Supplemental Online Content

Gao W, Sanna M, Chen YH, Tsai MK, Wen CP. Occupational sitting time, leisure physical activity, and all-cause and cardiovascular disease mortality. *JAMA Network Open*. 2024;7(1):e2350680. doi:10.1001/jamanetworkopen.2023.50680

**eFigure 1.** Data Flow Diagram Including Excluded and Missing Data

**eFigure 2.** Percentage of Participants Physically Active and Percentage of Participants Mostly Sitting at Work in the MJ Cohort Between 1996 and 2017

**eTable 1.** Occupational Sitting Status Distribution at First and at Second Visit, MJ Cohort 1996-2017

**eTable 2.** Adjusted Hazard Ratios (HRs) for Expanded CVD Mortality by Occupational Sitting Status Across Subgroups

This supplemental material has been provided by the authors to give readers additional information about their work.

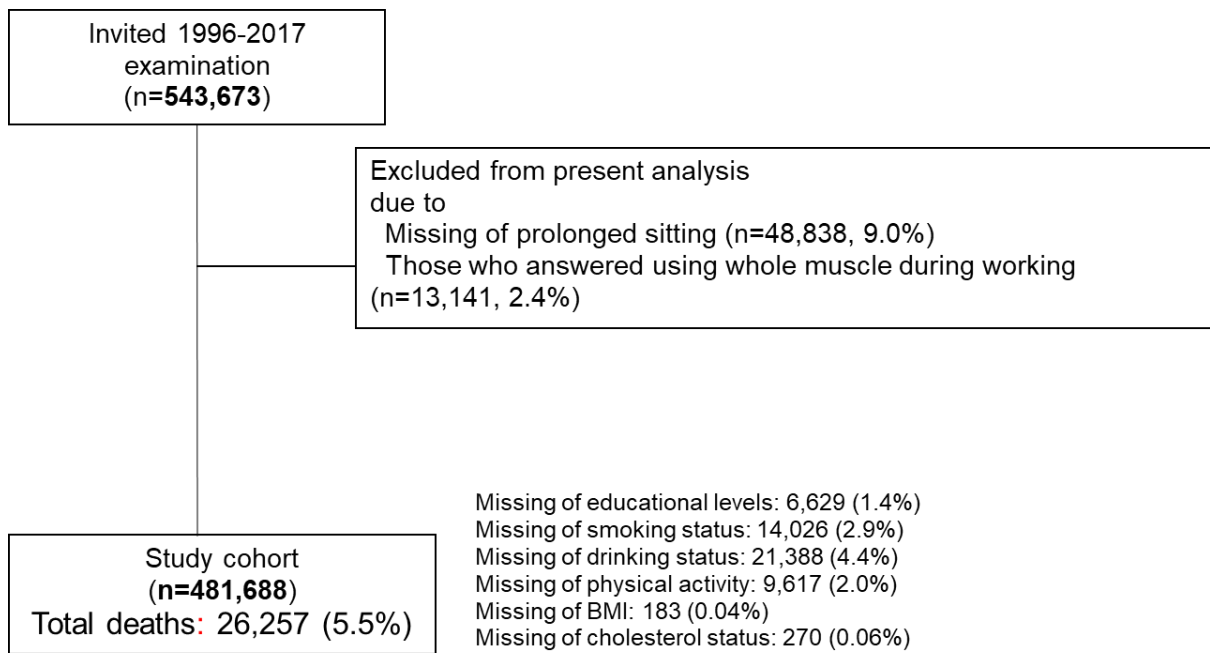

**eFigure 1 Data Flow Diagram Including Excluded and Missing Data**

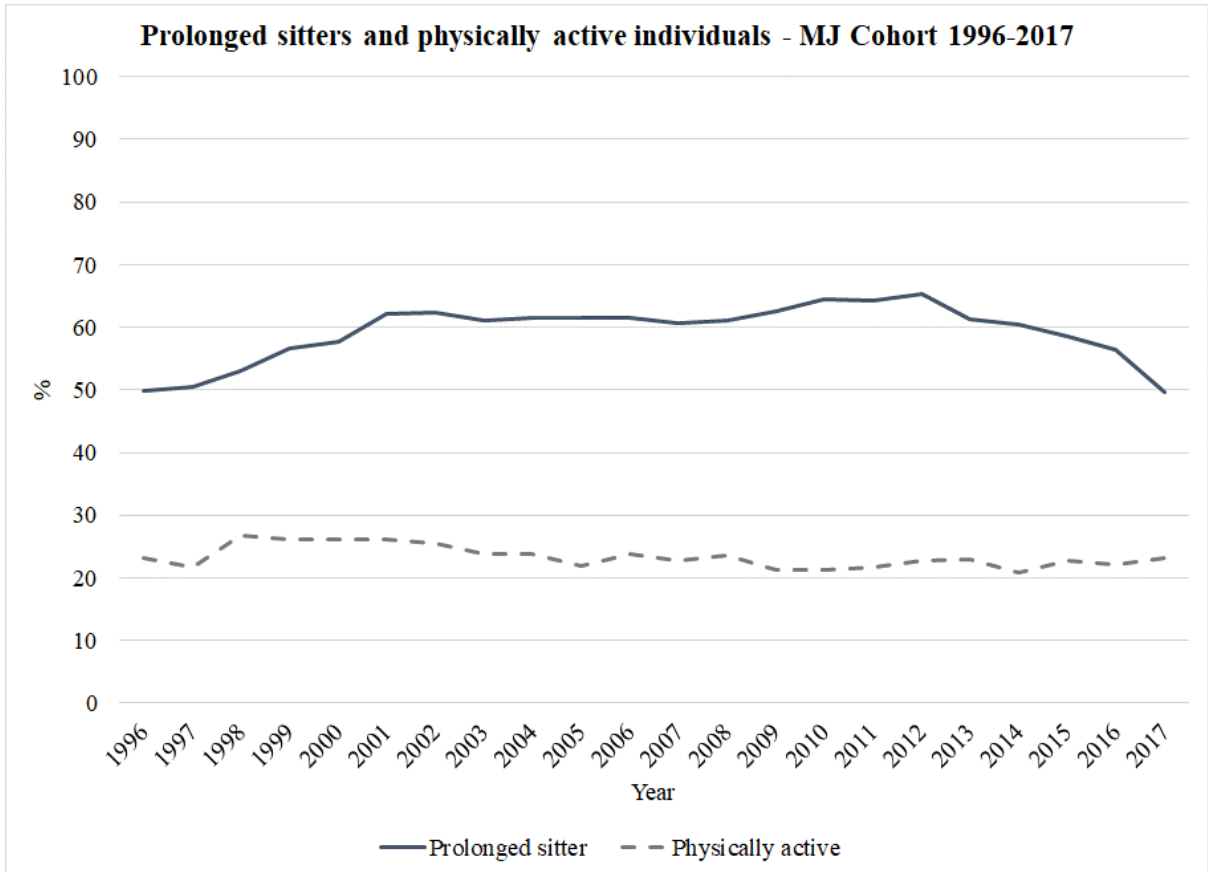

**eFigure 2** Percentage of Participants Physically Active and Percentage of Participants Mostly Sitting at Work in the MJ Cohort Between 1996 and 2017

**eTable 1** Occupational Sitting Status Distribution at First and at Second Visit, MJ Cohort 1996-2017

| First visit<br>Second visit                                | Mostly sitting<br>[N, (%)] | Alternating sitting<br>and non-sitting<br>[N, (%)] | Mostly non-<br>sitting<br>[N, (%)] | Total<br>[N, (%)] |
|------------------------------------------------------------|----------------------------|----------------------------------------------------|------------------------------------|-------------------|
| <b>Mostly sitting</b><br>[N, (%)]                          | 106,994 (53.9%)            | 18,439 (9.3%)                                      | 2,778 (1.4%)                       | 128,211 (64.5%)   |
| <b>Alternating sitting and<br/>non-sitting</b><br>[N, (%)] | 14,708 (7.4%)              | 32,515 (16.4%)                                     | 6,101 (3.1%)                       | 53,324 (26.8%)    |
| <b>Mostly non-sitting</b><br>[N, (%)]                      | 2,228 (1.1%)               | 5,632 (2.8%)                                       | 9,270 (4.7%)                       | 17,130 (8.6%)     |
| <b>Total [N, (%)]</b>                                      | 123,930 (62.4%)            | 56,586 (28.5%)                                     | 18,149 (9.1%)                      | 198,665 (100%)    |

The Spearman's rank correlation coefficient between occupational sitting status at the first visit and occupational sitting status at the second visit was equal to 0.61 ( $p < 0.001$ ).

**eTable 2** Adjusted Hazard Ratios (HRs) for Expanded CVD Mortality by Occupational Sitting

Status Across Subgroups

|                          | Population                          | Expanded CVD |      |              |
|--------------------------|-------------------------------------|--------------|------|--------------|
|                          |                                     | Deaths       | HR*  | [95% CI]     |
| <b>All participants</b>  | Mostly sitting                      | 4,646        | 1.46 | [1.35, 1.58] |
|                          | Alternating sitting and non-sitting | 1,928        | 1.13 | [1.04, 1.23] |
|                          | Mostly non-sitting                  | 962          |      | Ref.         |
| <b>Men</b>               | Mostly sitting                      | 2,426        | 1.42 | [1.29, 1.55] |
|                          | Alternating sitting and non-sitting | 946          | 1.14 | [1.03, 1.26] |
|                          | Mostly non-sitting                  | 726          |      | Ref.         |
| <b>Women</b>             | Mostly sitting                      | 2,220        | 1.42 | [1.22, 1.66] |
|                          | Alternating sitting and non-sitting | 982          | 1.06 | [0.91, 1.25] |
|                          | Mostly non-sitting                  | 236          |      | Ref.         |
| <b>Age&lt;60</b>         | Mostly sitting                      | 1,288        | 1.44 | [1.26, 1.63] |
|                          | Alternating sitting and non-sitting | 787          | 1.19 | [1.04, 1.35] |
|                          | Mostly non-sitting                  | 409          |      | Ref.         |
| <b>Age≥60</b>            | Mostly sitting                      | 3,358        | 1.47 | [1.33, 1.63] |
|                          | Alternating sitting and non-sitting | 1,141        | 1.09 | [0.98, 1.22] |
|                          | Mostly non-sitting                  | 553          |      | Ref.         |
| <b>Smokers</b>           | Mostly sitting                      | 1,675        | 1.43 | [1.28, 1.59] |
|                          | Alternating sitting and non-sitting | 653          | 1.09 | [0.97, 1.23] |
|                          | Mostly non-sitting                  | 503          |      | Ref.         |
| <b>Never-smokers</b>     | Mostly sitting                      | 2,722        | 1.47 | [1.31, 1.65] |
|                          | Alternating sitting and non-sitting | 1,165        | 1.15 | [1.02, 1.30] |
|                          | Mostly non-sitting                  | 391          |      | Ref.         |
| <b>BMI≥25</b>            | Mostly sitting                      | 2,061        | 1.50 | [1.32, 1.71] |
|                          | Alternating sitting and non-sitting | 867          | 1.17 | [1.02, 1.34] |
|                          | Mostly non-sitting                  | 363          |      | Ref.         |
| <b>BMI≥30</b>            | Mostly sitting                      | 376          | 1.47 | [1.07, 2.00] |
|                          | Alternating sitting and non-sitting | 147          | 1.08 | [0.77, 1.51] |
|                          | Mostly non-sitting                  | 57           |      | Ref.         |
| <b>Non-hypertensives</b> | Mostly sitting                      | 1,393        | 1.42 | [1.25, 1.61] |
|                          | Alternating sitting and non-sitting | 653          | 1.08 | [0.94, 1.24] |
|                          | Mostly non-sitting                  | 395          |      | Ref.         |
| <b>Hypertensives</b>     | Mostly sitting                      | 3,253        | 1.42 | [1.28, 1.57] |

|                      |                                     |       |      |              |
|----------------------|-------------------------------------|-------|------|--------------|
|                      | Alternating sitting and non-sitting | 1,275 | 1.08 | [0.97, 1.20] |
|                      | Mostly non-sitting                  | 567   |      | Ref.         |
| <b>Non-diabetics</b> | Mostly sitting                      | 2,653 | 1.32 | [1.21, 1.45] |
|                      | Alternating sitting and non-sitting | 1,389 | 1.11 | [1.00, 1.22] |
|                      | Mostly non-sitting                  | 729   |      | Ref.         |
| <b>Diabetics</b>     | Mostly sitting                      | 1,693 | 1.47 | [1.27, 1.71] |
|                      | Alternating sitting and non-sitting | 539   | 1.04 | [0.88, 1.23] |
|                      | Mostly non-sitting                  | 233   |      | Ref.         |

\*All HRs are adjusted for gender, age, education, smoking, drinking, and body mass index (BMI).
