# Supplementary material for: Occupational Sitting Time, Leisure Physical Activity, and All-Cause and Cardiovascular Disease Mortality
Source: PubMed Central journal article supplement (PMC10799265; doi:10.1001/jamanetworkopen.2023.50680), 2024-01-19
Supplement: jamanetwopen-e2350680-s002.pdf [file jamanetwopen-e2350680-s002.pdf]

## Data Sharing Statement

Gao. Occupational Sitting Time, Leisure Physical Activity, and All-Cause and Cardiovascular Disease Mortality. *JAMA Netw Open*. Published January 19, 2024.

doi:10.1001/jamanetworkopen.2023.50680

### Data

**Data available:** Yes

**Data types:** Deidentified participant data

**How to access data:** The Taiwan MJ Cohort is available to the worldwide research community and offers opportunities for collaboration. Those applying for data access should contact the MJ Health Research Foundation at <http://www.mjhrf.org/>

**When available:** With publication

### Supporting Documents

**Document types:** None

### Additional Information

**Who can access the data:** researchers whose proposed use of the data has been approved

**Types of analyses:** for any purpose

**Mechanisms of data availability:** after approval of a proposal
